# Supplementary material for: Gamma-Irradiated Bacille Calmette-Guérin Vaccination Does Not Modulate the Innate Immune Response during Experimental Human Endotoxemia in Adult Males
Source: Hindawi journal article supplement (doi:10.1155/2015/261864), 2015-01-01

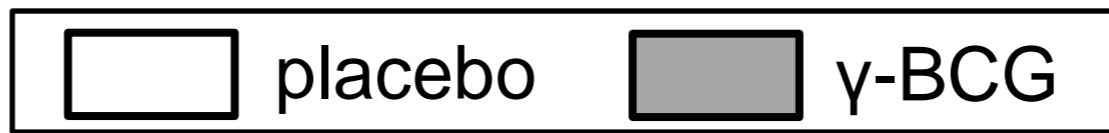

***M. tuberculosis***

**LPS**

***S. aureus***

***C. albicans***

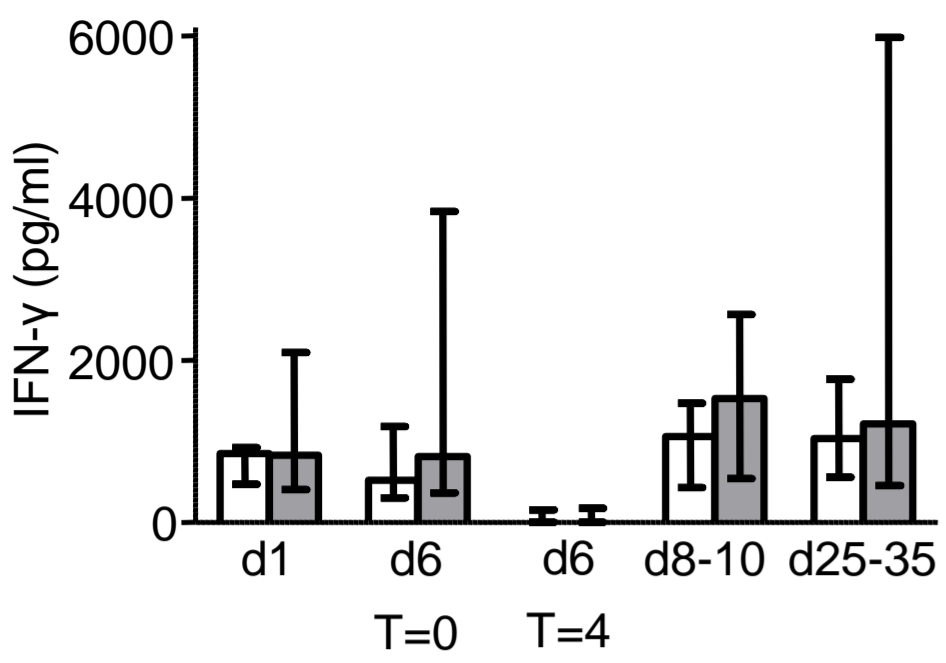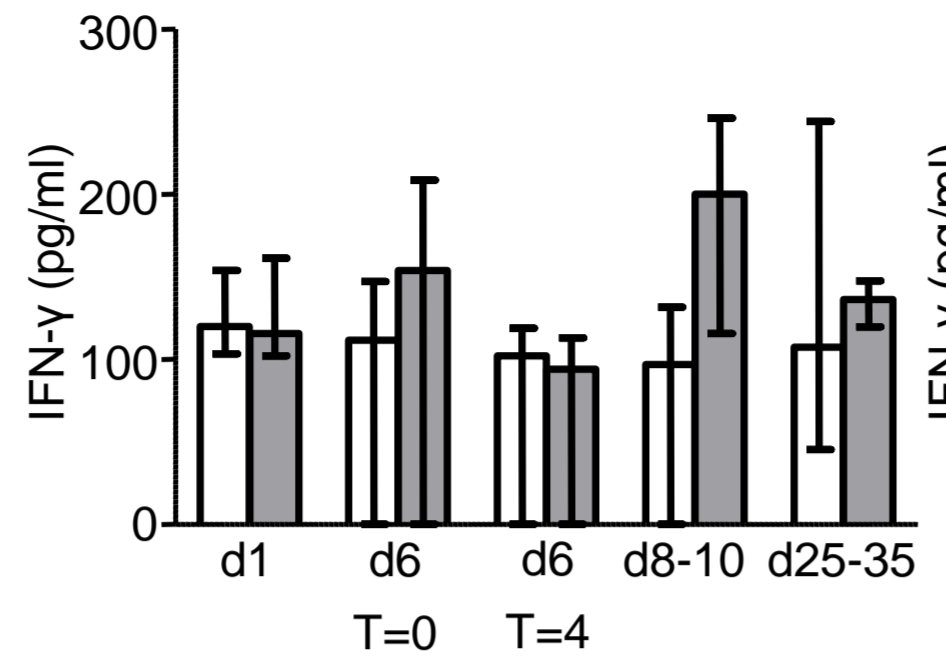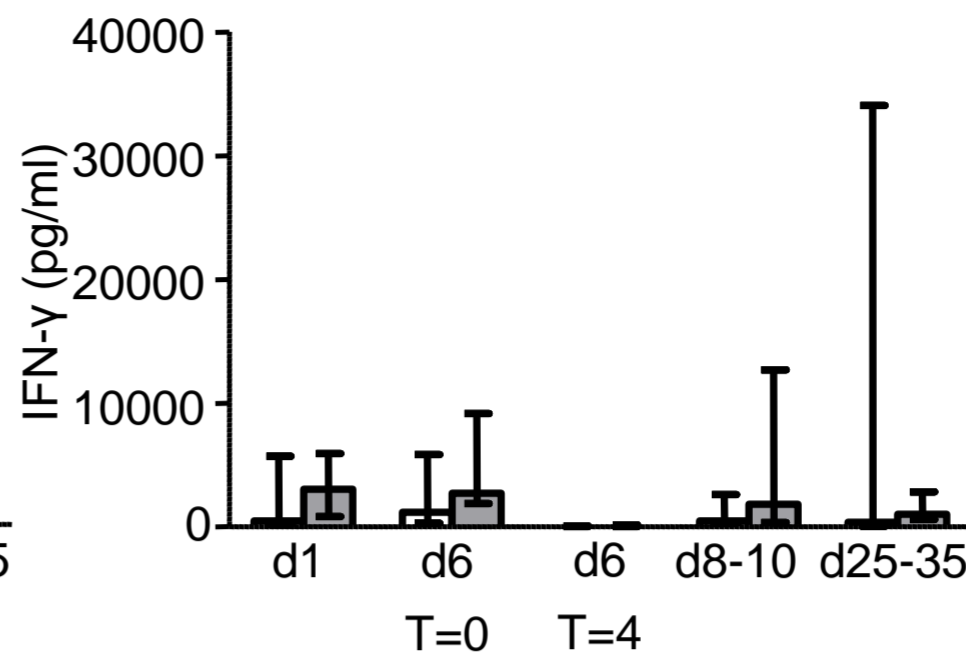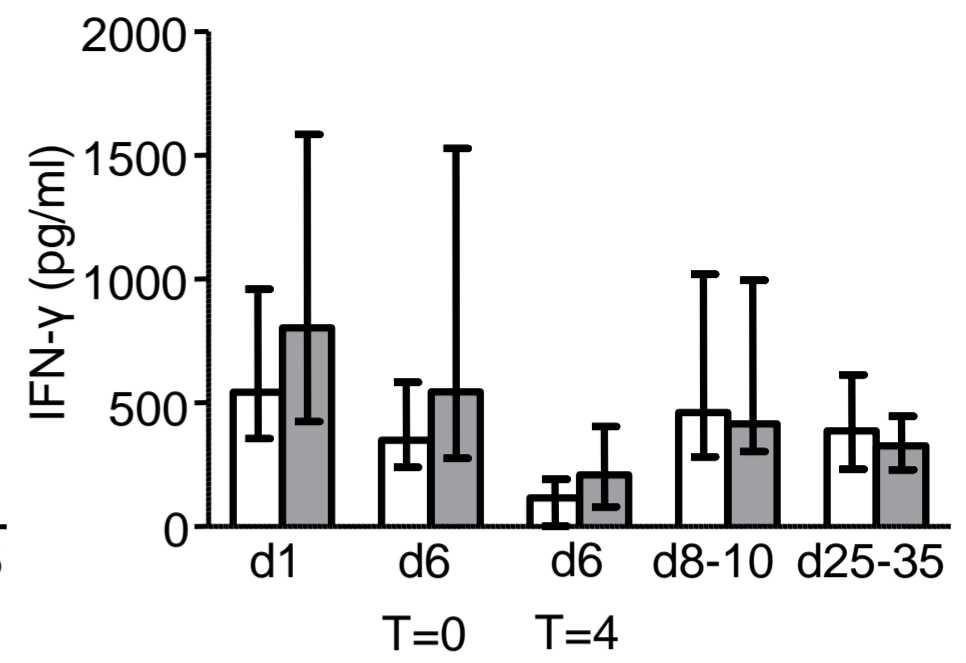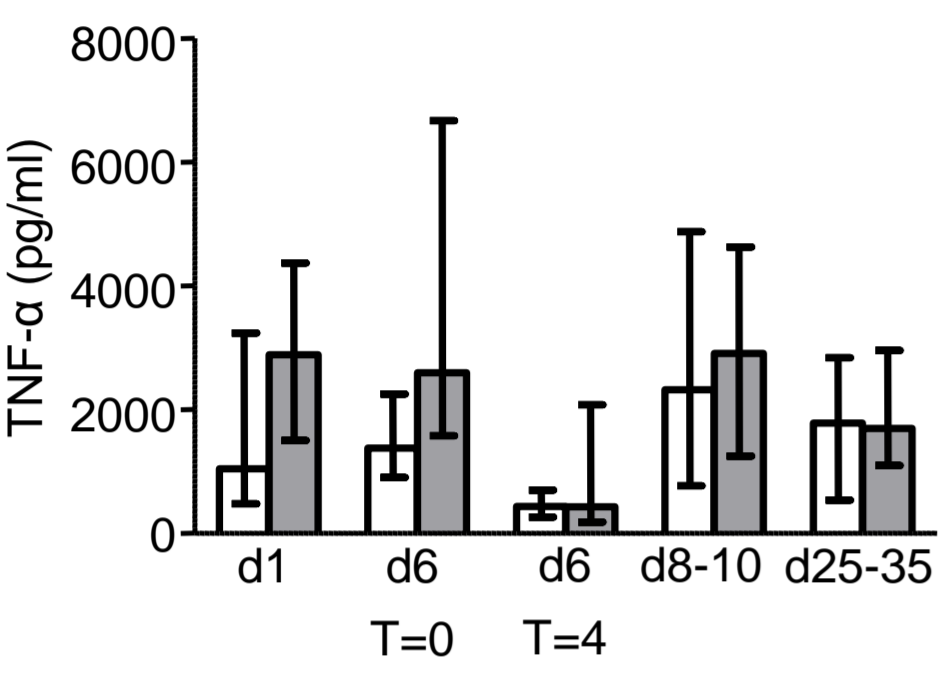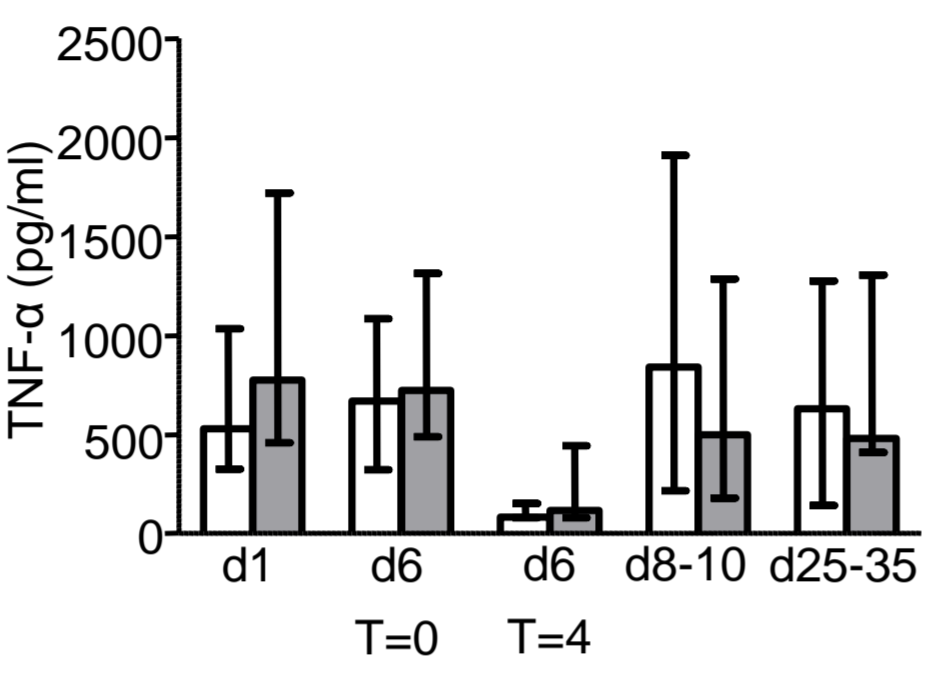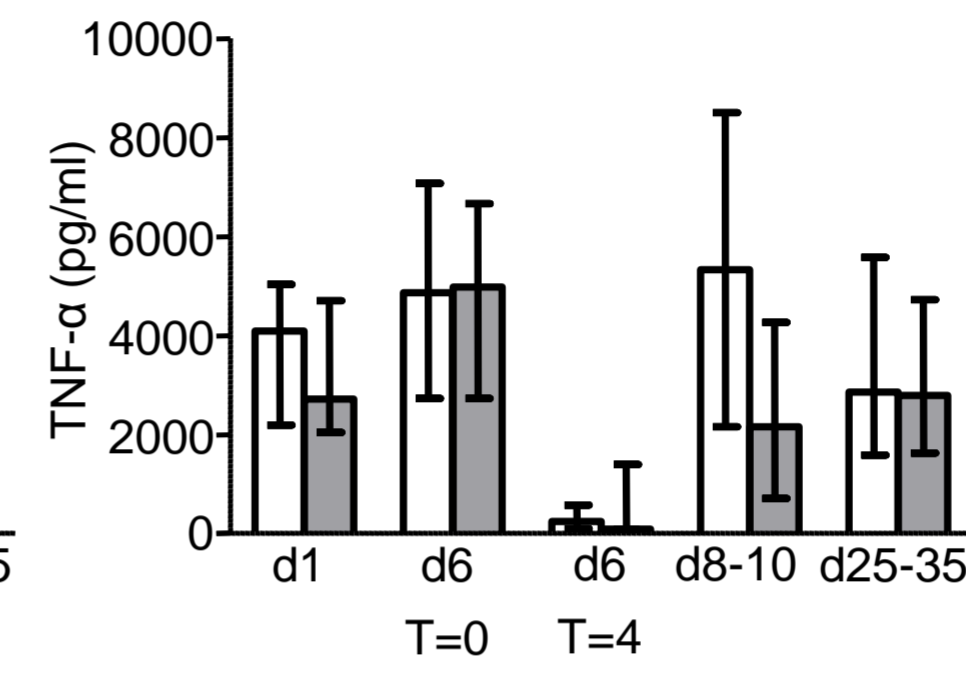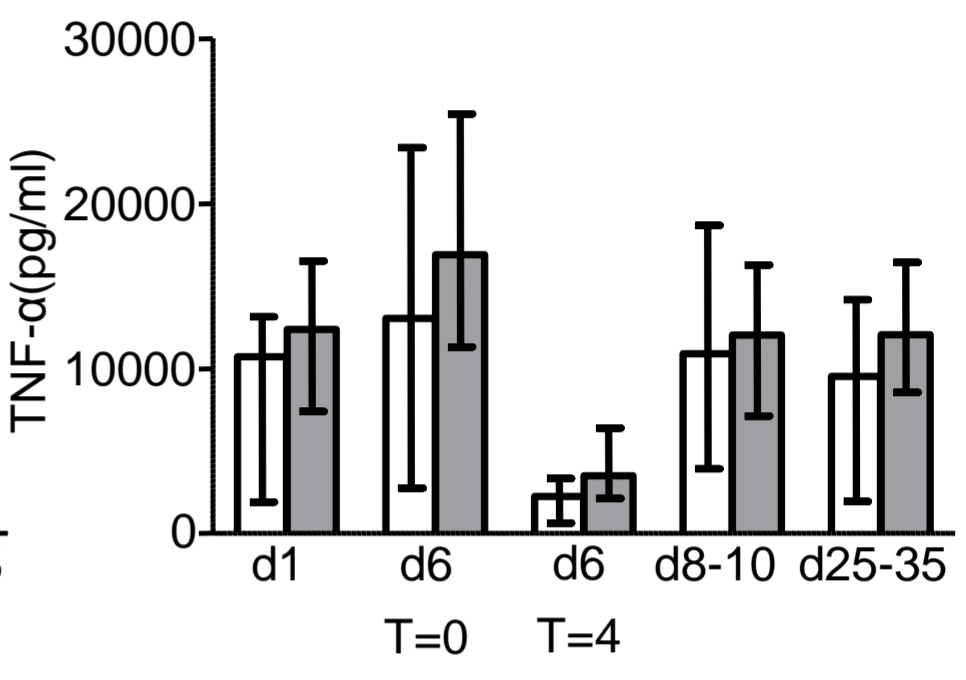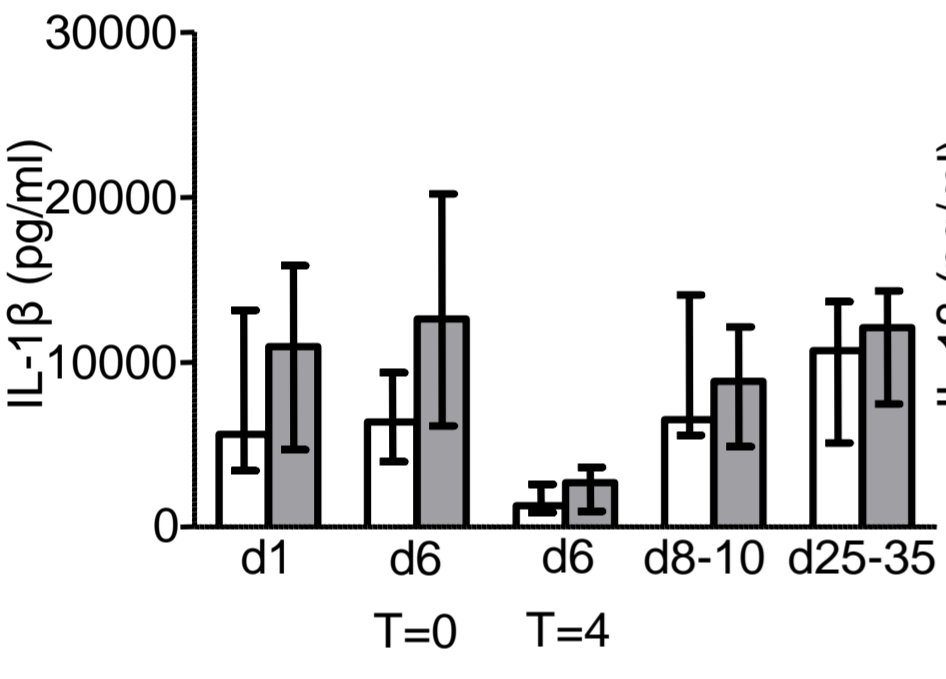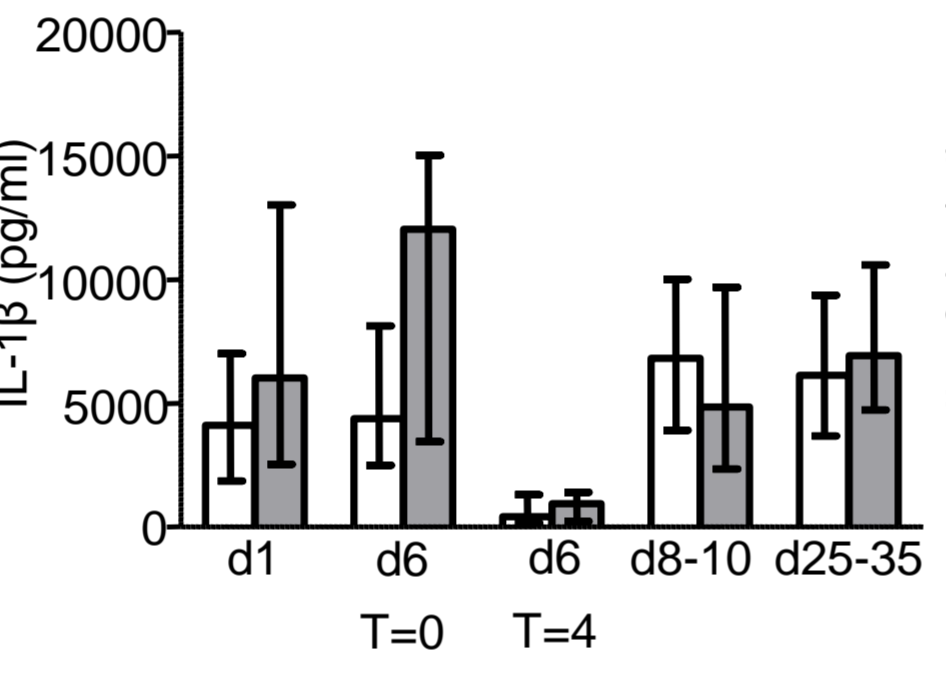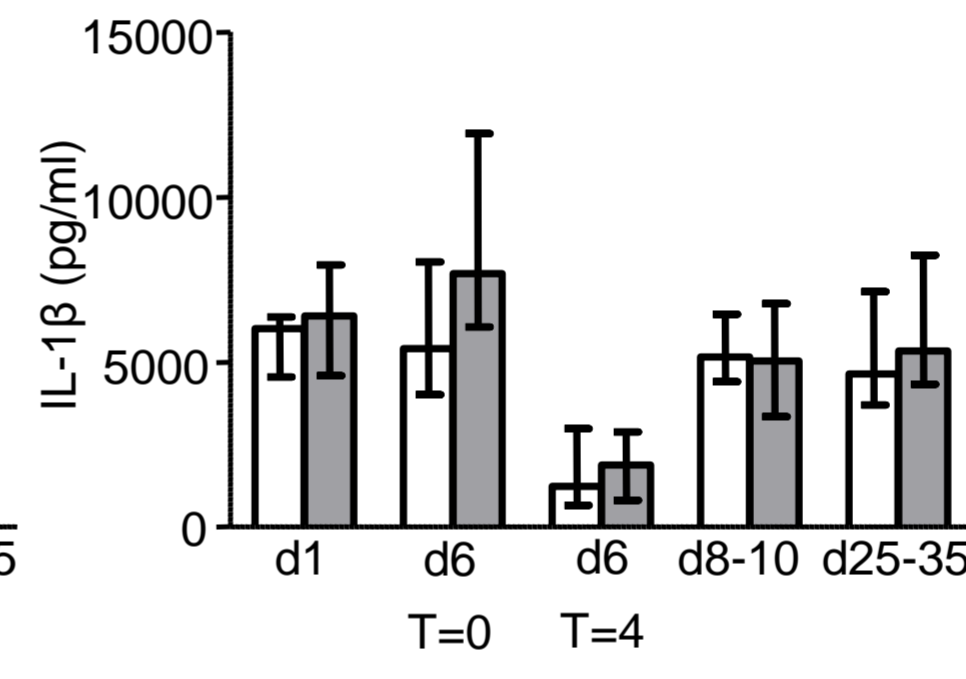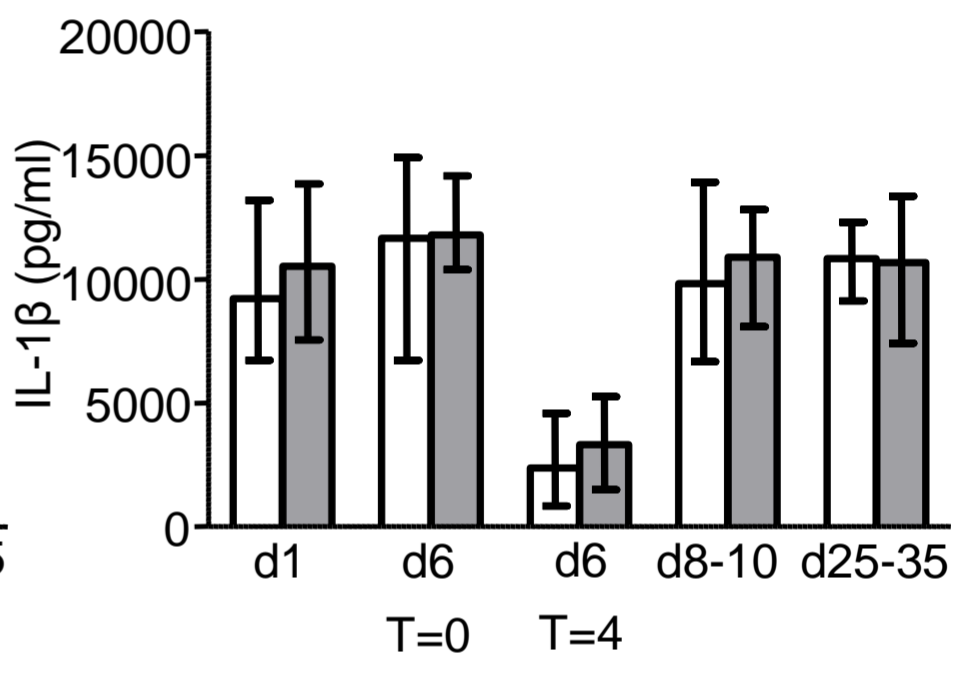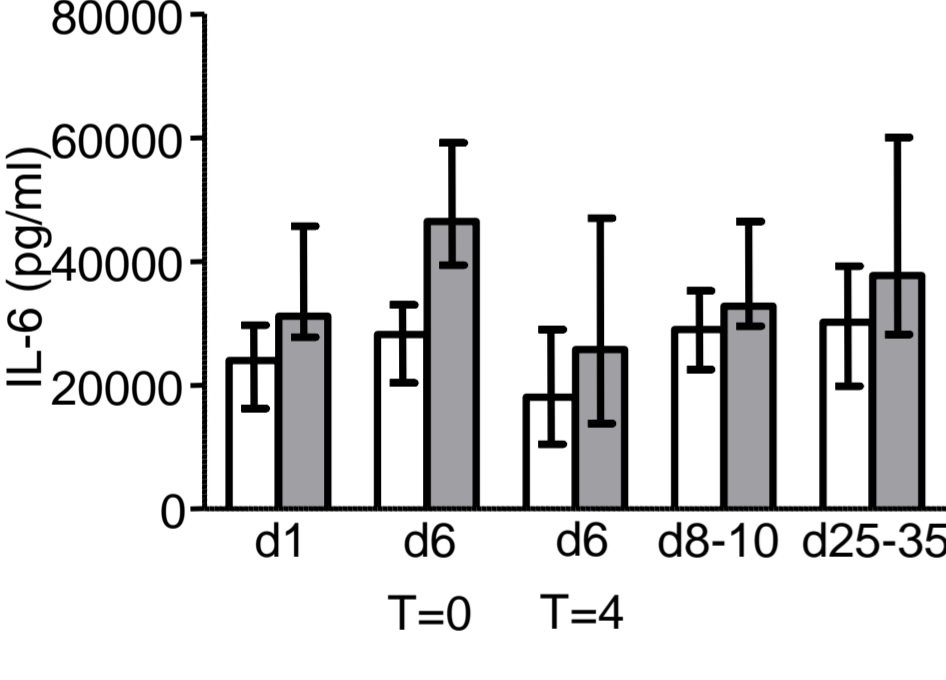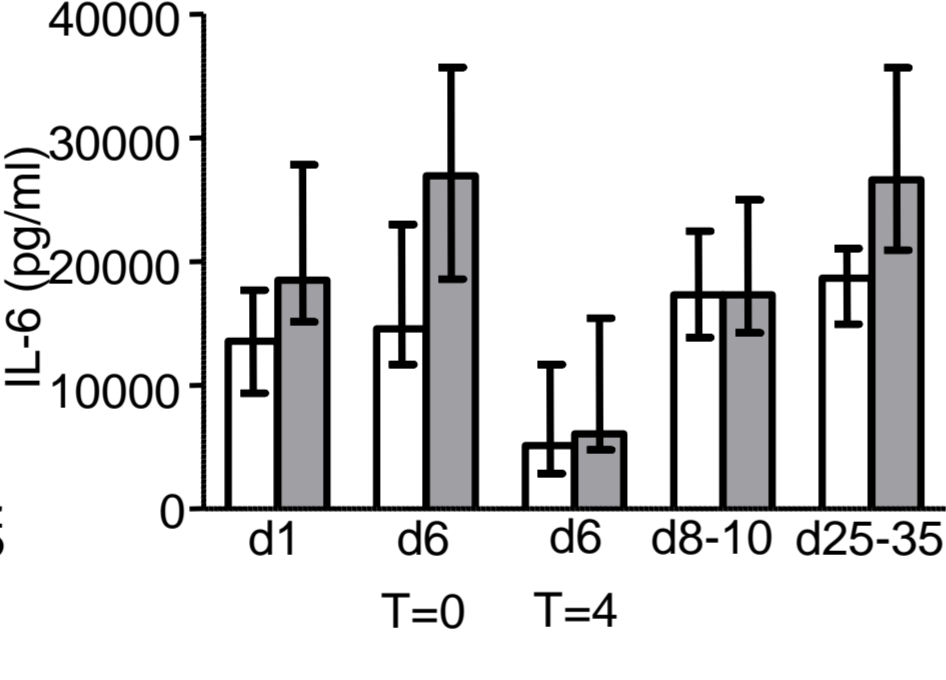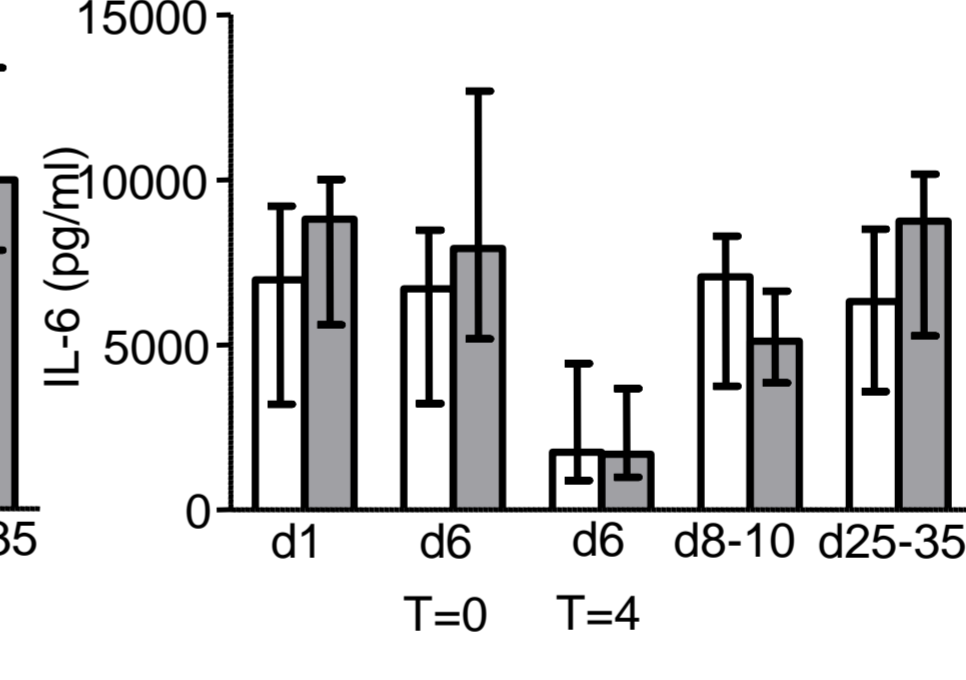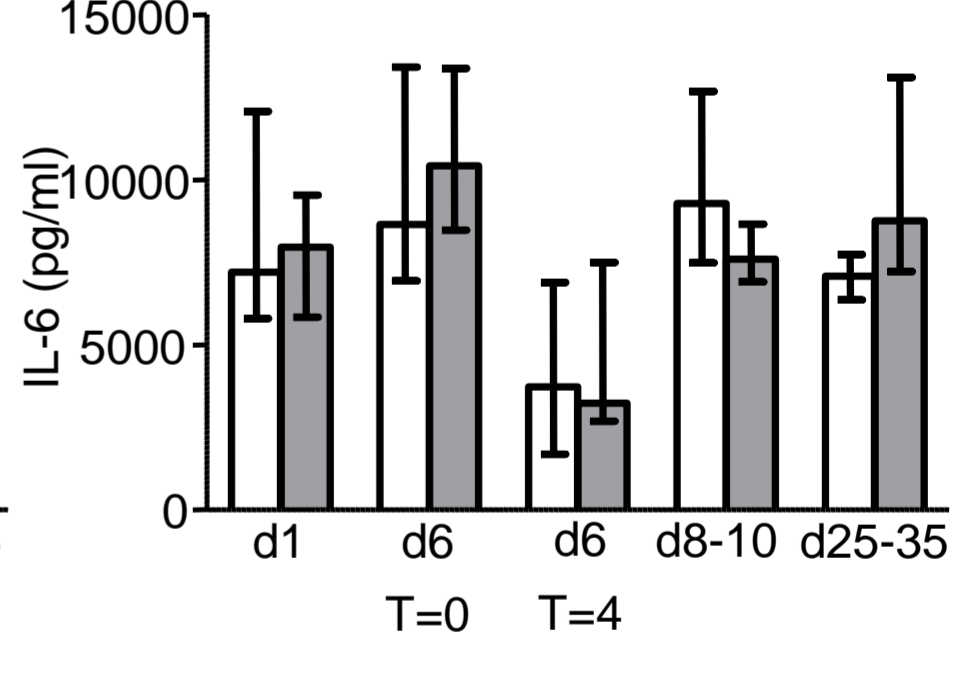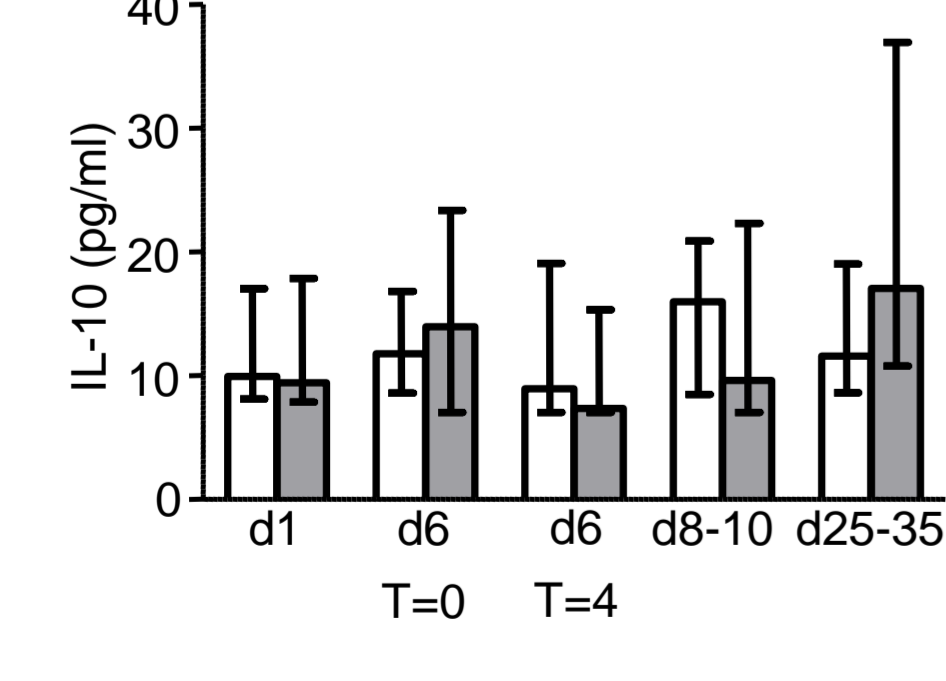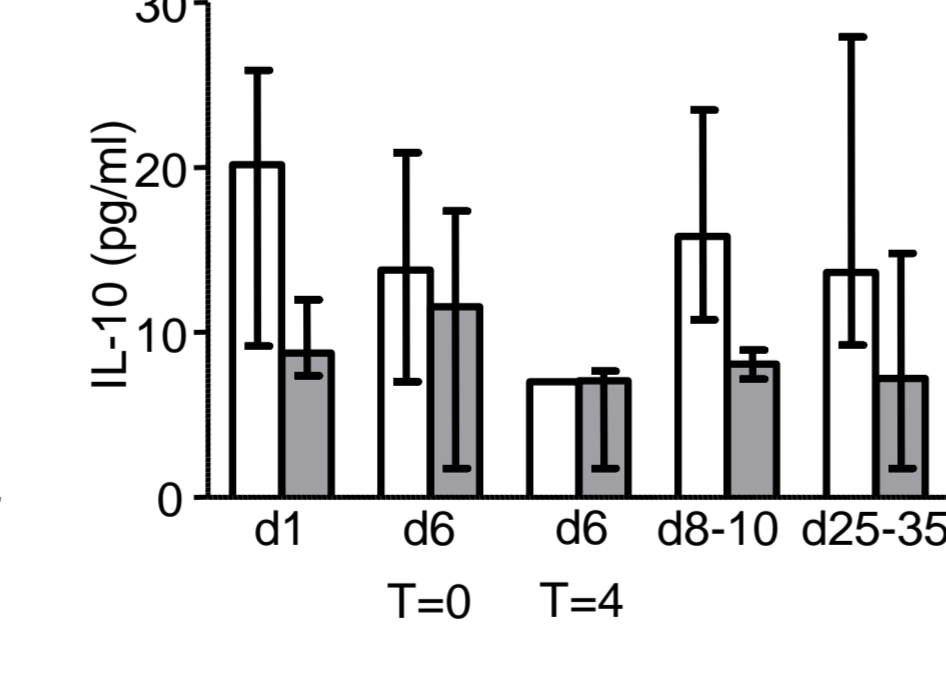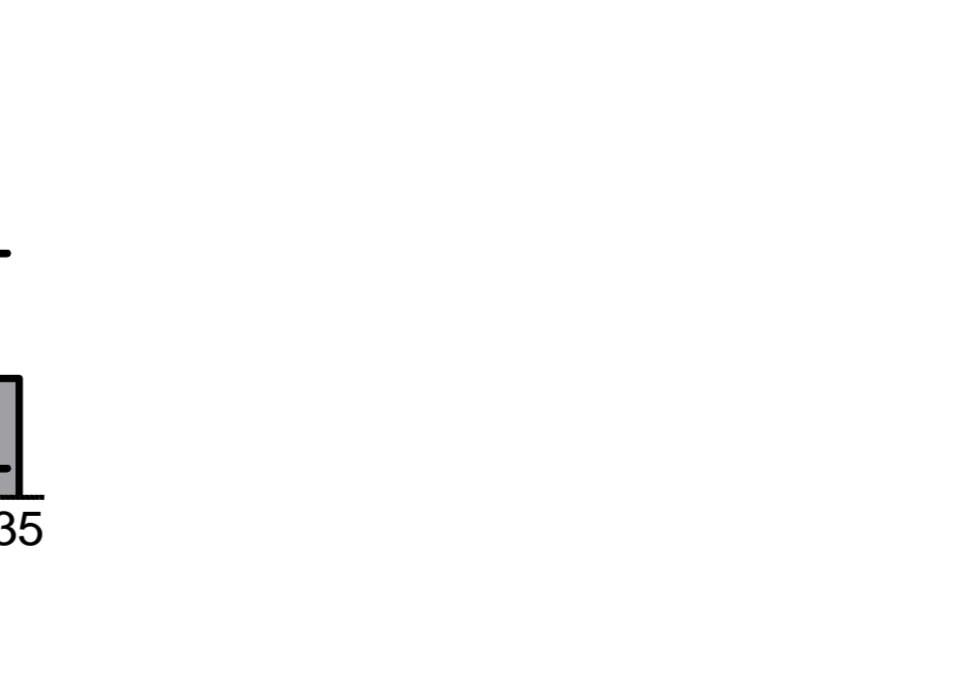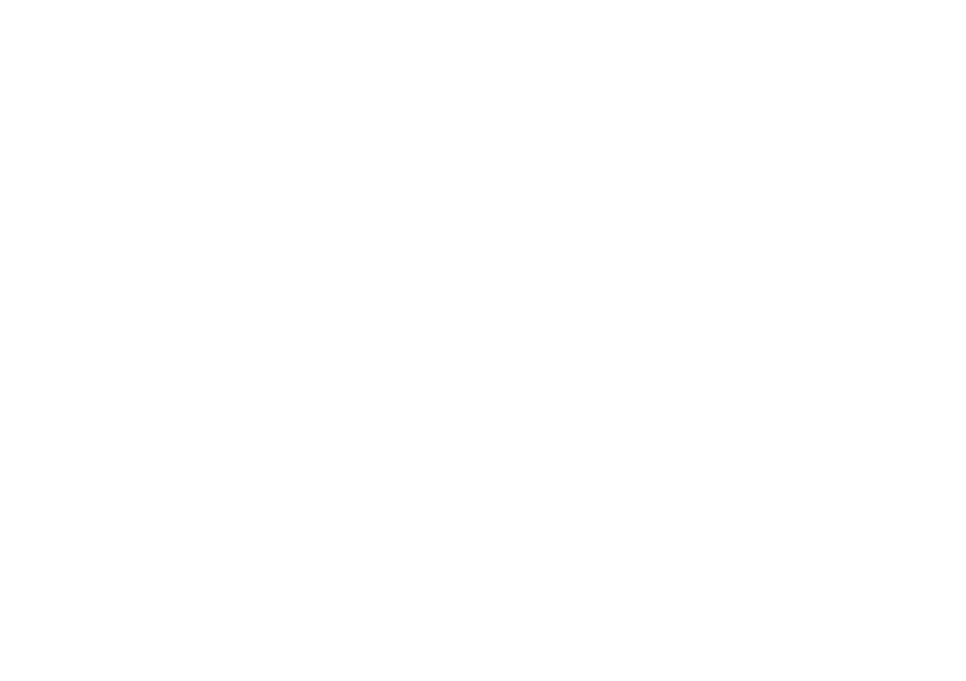

Supplement: f3 [file 261864.f3.pdf]
