# Supplementary material for: Gamma-Irradiated Bacille Calmette-Guérin Vaccination Does Not Modulate the Innate Immune Response during Experimental Human Endotoxemia in Adult Males
Source: Hindawi journal article supplement (doi:10.1155/2015/261864), 2015-01-01

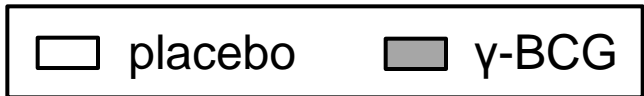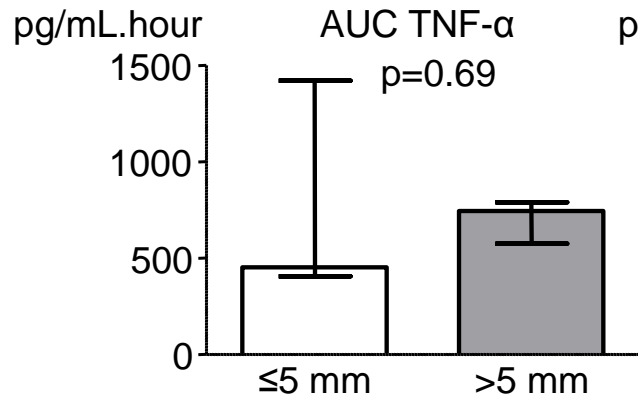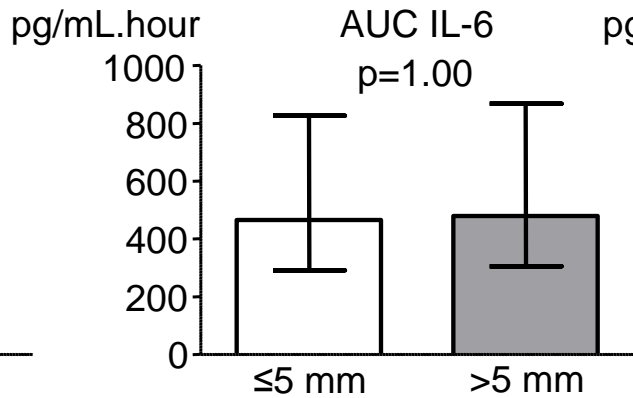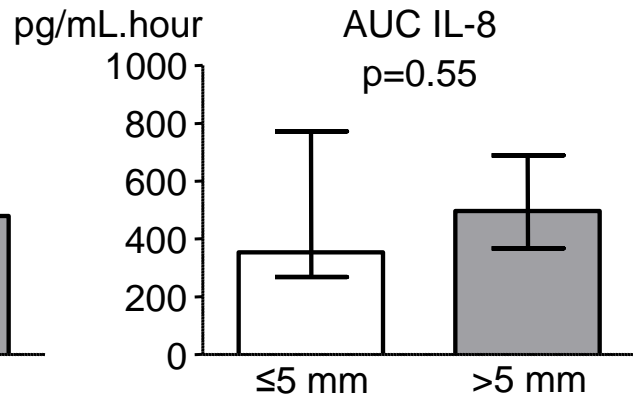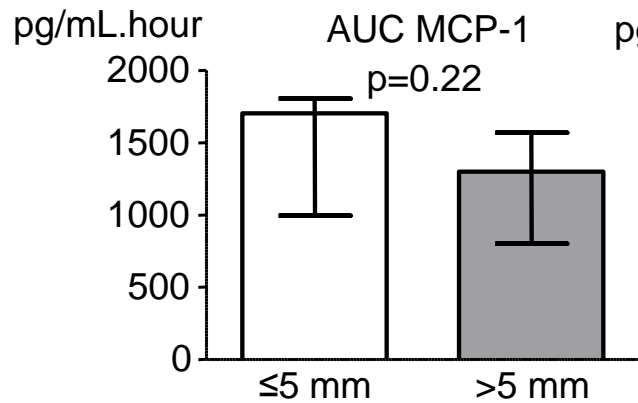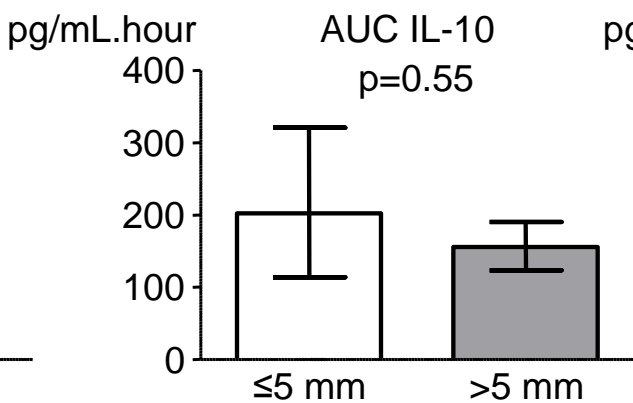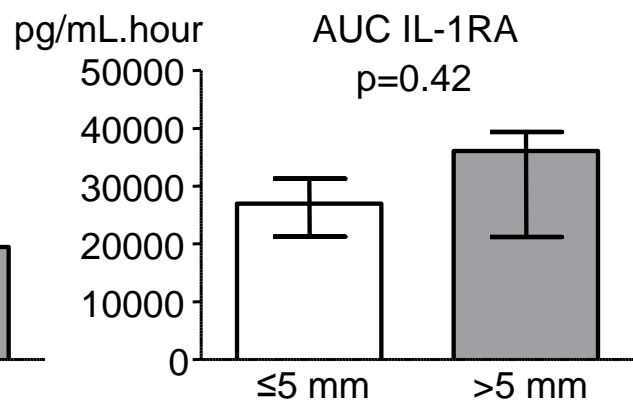

Supplement: f1 [file 261864.f1.pdf]
